# Supplementary material
Source: PubMed Central journal article supplement (PMC3862051)
Supplement: 10-1055-s-0033-1351032-sup_gf698.pdf [file 10-1055-s-0033-1351032-sup_gf698.pdf]

# Regulation endothelialer Permeabilität im Corpus luteum: eine Literaturübersicht

## Regulation of Endothelial Permeability in the Corpus Luteum: A Review of the Literature

### Autoren

D. Herr<sup>1</sup>, I. Bekes<sup>2</sup>, C. Wulff<sup>2</sup>

### Institute

<sup>1</sup> Frauenklinik, Universitätsklinikum Homburg/Saar, Homburg  
<sup>2</sup> Frauenklinik, Universitätsklinikum Ulm, Ulm

### Schlüsselwörter

- Permeabilität
- Tight Junction
- Adherens Junction
- Corpus luteum
- hCG

### Key words

- permeability
- tight junction
- adherens junction
- corpus luteum
- hCG

**eingereicht** 14. 7. 2013

**revidiert** 17. 9. 2013

**akzeptiert** 19. 9. 2013

### Bibliografie

**DOI** <http://dx.doi.org/10.1055/s-0033-1351032>  
Geburtsh Frauenheilk 2013; 73:  
1–5 © Georg Thieme Verlag KG  
Stuttgart · New York ·  
ISSN 0016-5751

### Korrespondenzadresse

**PD Dr. Daniel Herr**  
Universitätsklinikum  
Homburg/Saar  
Frauenklinik  
Kirrbergerstraße 100  
66424 Homburg  
daherr@gmx.de

### Zusammenfassung

Die Entwicklung des humanen Corpus luteum ist durch ein streng reguliertes System von miteinander kommunizierenden Zellen, den lutealen Steroidhormon-produzierenden Zellen und den Endothelzellen, geprägt. Diese Zell-Zell-Kommunikation ermöglicht die Kontrolle von Neoangiogenese, die für die Entstehung des Corpus luteum Voraussetzung ist und deren Aufgabe die rasche Freigabe von großen Mengen Progesteron ins Blutgefäßsystem ist. Voraussetzung für diesen Vorgang ist die hormonelle Regulation der Endothelzellproliferation sowie der Gefäßpermeabilität durch LH und hCG. Das morphologische Korrelat der endothelialen Permeabilität sind Zell-Zell-Adhäsionsmoleküle wie Adherens Junctions (AJ) und Tight Junctions (TJ), die „reißverschlussartig“ den Spalt benachbarter interagierender Endothelzellen öffnen und schließen. Im Corpus luteum konnten verschiedene Zell-Adhäsionsmoleküle nachgewiesen werden, darunter Occludin, Claudin 1 und Claudin 5 sowie VE-Cadherin. Es ist davon auszugehen, dass die Regulation von AJ- und TJ-Proteinen von besonderer Bedeutung für die Permeabilität und damit die Funktionalität des Corpus luteum in der Frühschwangerschaft ist, da hCG-Behandlung zu einer Herunterregulation der Zell-Adhäsionsmoleküle in den Lutealgefäßen führt. Offensichtlich ist dieser Effekt VEGF-vermittelt. Funktionell betrachtet führt die hCG-abhängige und VEGF-vermittelte Herunterregulation von Zelladhäsionsmolekülen zu einer verminderten Durchlässigkeit der Zell-Zell-Kontakte und damit zu gesteigerter endothelialer Permeabilität. Dabei werden die verschiedenen Zell-Adhäsionsmoleküle nicht nur direkt durch VEGF reguliert, sondern sie interagieren auch untereinander und beeinflussen sich auf diese Weise gegenseitig.

### Abstract

The development of the human corpus luteum (yellow body) is dictated by a strictly controlled system of mutually communicating cells, the luteal steroid hormone-producing cells and endothelial cells. This cell-to-cell communication facilitates control of neoangiogenesis which is a prerequisite for the development of the corpus luteum and its function, the rapid release of large amounts of progesterone into the blood-vascular system. Preconditions for this process are the hormonal regulation of endothelial cell proliferation as well as of vascular permeability through LH and hCG. The morphological correlates of endothelial permeability are cell-to-cell adhesion molecules such as adherens junctions (AJ) and tight junctions (TJ) that open and close the gaps between mutually interacting, neighbouring endothelial cells like a “zip fastener”. Various types of cell adhesion molecules have been detected in the corpus luteum such as occludin, claudin 1 and claudin 5 as well as VE-cadherin. It may be assumed that the regulation of AJ and TJ proteins is of particular importance for the permeability and thus for the function of the corpus luteum in early pregnancy since hCG treatment leads to a down-regulation of cell adhesion molecules in the luteal vessels. This effect is apparently mediated by VEGF. From a functional point of view, the hCG-dependent and VEGF-mediated down-regulation of cell adhesion molecules leads to a reduced transmissibility of cell-to-cell contacts and thus to an increased endothelial permeability. In this process the various cell adhesion molecules are not only directly regulated by VEGF but they also mutually interact and thus influence one another.

## Einleitung

Das Corpus luteum ist eine intermediär endokrin aktive Drüse, die im Rahmen des Zyklus alternierend einem Wechsel von Entstehung und Degeneration unterliegt. Das Corpus luteum spielt dabei eine zentrale Rolle für den Erhalt der Schwangerschaft. Der präovulatorische LH-Peak löst zunächst die Ovulation und danach sehr schnell die Umwandlung des gesprungenen Follikels in ein Corpus luteum aus. Dieser Vorgang verläuft weitgehend durch Progesteron gesteuert, das vom Corpus luteum synthetisiert wird und für die Implantation sowie den Erhalt der Schwangerschaft essenziell ist [1]. Falls keine Schwangerschaft eintritt, degeneriert das Corpus luteum 14 Tage nach der Ovulation zum bindegewebig umgebauten Corpus albicans. Kommt es jedoch zu einer Befruchtung der Eizelle, wird das Fortbestehen des Corpus luteum sowohl direkt als auch indirekt durch die gemeinsamen Effekte von LH und hCG gesichert [2–7]. Diese Beobachtung wird durch die Tatsache untermauert, dass das Corpus luteum auch außerhalb einer Schwangerschaft durch exogene Gabe von hCG erhalten werden kann [8].

Das Corpus luteum besteht aus verschiedenen Zelltypen, u. a. aus Endothelzellen, Granulosaluteinzellen und Thekaluteinzellen. Die Endothelzellen sind dabei für die Kontrolle der Gefäßpermeabilität verantwortlich, was eine unabdingbare Voraussetzung für die Entwicklung der Corpus luteum darstellt. Die Permeabilität selbst wird durch streng reguliertes Öffnen und Schließen der Zell-Zell-Kontakte zwischen den Endothelzellen kontrolliert [9–11]. Aus diesem Grund kann jede Beeinträchtigung der Expression der AJ und TJ zu einer gestörten Endothelzellfunktion mit konsekutiven funktionellen Konsequenzen wie z. B. Ödemen oder Aszites im Rahmen eines ovariellen Hyperstimulationssyndroms (OHSS) führen [12–14]. Hierbei wirkt die iatrogene Verabreichung von hCG als Unterstützung der Lutealphase, was die Lutealfunktion steigert, jedoch aber auch das Risiko für die Entstehung eines OHSS erhöht [15]. Ein solches ist durch eine vermehrte Durchlässigkeit der Kapillaren charakterisiert, was zu einem Flüssigkeitsshift von intravasal nach extravasal und damit zu Aszites führt [16]. Im Folgenden sind die genauen molekularen Mechanismen, die an der Regulation der Endothelfunktion und damit der Flüssigkeitsbarriere der Gefäße beteiligt sind, dargestellt. Ein besseres Verständnis dieser Mechanismen kann dabei hoffentlich in der Zukunft helfen, neue therapeutische Optionen zu entwickeln und auf diese Weise den Gewebeschaden durch Beeinflussung der Gefäßpermeabilität begrenzen.

## Molekulare Regulation endothelialer Permeabilität

Die parazelluläre endotheliale Permeabilität wird zumindest durch 2 verschiedene Typen von Zell-Zell-Kontakten gesteuert, den AJ und den TJ. Diese werden aus verschiedenen transmembranären Proteinen gebildet, die homophile Zell-Zell-Interaktionen fördern und intrazelluläre Signale weiterleiten [17]. Es wurde mehrfach gezeigt, dass diese Zell-Zell-Kontakte nicht nur während der Embryonalentwicklung, sondern auch in ruhenden Zellen dynamisch umgewandelt werden [18]. Adhäsionsmoleküle wie AJ und TJ formen dabei Komplexe, die „reißverschlussartig“ die Durchlässigkeit, also die Permeabilität des Spaltes zwischen benachbarten, miteinander interagierenden Zellen regulieren [19–22].

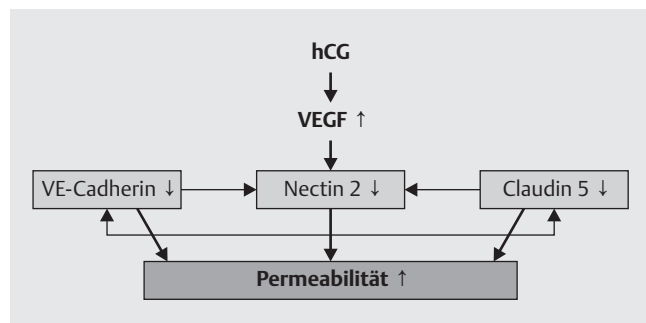

Abb. 1 Modell für die Regulation des Gefäßsystems im Corpus luteum.

Endothelzellen exprimieren gewebespezifische Transmembranproteine: das AJ-Protein VE-(vascular-endothelial-)Cadherin und das TJ-Protein Claudin 5 [9, 23]. Claudin-5-defiziente Knockout-Mäuse zeigen eine normale Embryonalentwicklung, sterben aber aufgrund einer defekten Blut-Hirn-Schranke bereits kurz nach der Geburt [23]. Im Vergleich dazu erleiden VE-Cadherin-defiziente Mäuse mehrere schwere letale Defekte im Rahmen der embryonalen Angiogenese [24]. Dies deutet darauf hin, dass Zelladhäsionsmoleküle neben der strukturellen auch eine große funktionelle Bedeutung haben.

## Verteilung von Zelladhäsionsproteinen im humanen Corpus luteum

Verschiedenste Zelladhäsionsproteine lassen sich im Corpus luteum lokalisieren. Dazu gehören die TJ-Proteine Occludin, Claudin 1 und Claudin 5 sowie das AJ-Protein VE-Cadherin. Die Verteilung dieser Zell-Zell-Kontakte ist dabei naturgemäß in den verschiedenen Kompartimenten des Corpus luteum unterschiedlich. Im humanen Corpus luteum konnte Occludin ubiquitär in der Zellmembran von Endothelzellen im Bereich der Granulosa- und Thekakapillaren als auch in der Membran von Granulosaluteinzellen selbst nachgewiesen werden. Im Gegensatz dazu wird Occludin jedoch nicht im Bereich der Thekaluteinzellen exprimiert [25]. Der Nachweis von Occludin in epithelialen und endothelialen Zellen wurde auch für andere Gewebetypen wie z. B. Rattenlunge, menschliche Leber, Maushirn u. a. beschrieben [26–30].

Claudin 1 wird ausschließlich im Bereich der Membran der Granulosaluteinzellen exprimiert. Im Gegensatz zu Occludin ist Claudin 1 nur diskontinuierlich nachweisbar und nicht bandförmig. Dieses Verteilungsmuster ist vergleichbar mit dem, was auf der Oberfläche des humanen Ovariepithels zu beobachten ist [31]. Im Gegensatz zu den Endothelzellen des Gehirns und der Speicheldrüsen wird Claudin 1 nicht im Bereich der Lutealgefäße exprimiert [32, 33]. Claudin 5 dagegen ist ausschließlich spezifisch im Endothel des humanen Corpus luteum lokalisiert. Es lässt sich dabei v. a. in den Kapillaren des Granulosakompartiments und in den größeren Gefäßen der Theka nachweisen [25]. VE-Cadherin dagegen wird sowohl im Kapillarendothel der Granulosa als auch der Theka nachgewiesen. Es gibt keine eindeutige Erklärung für das gewebespezifisch so unterschiedliche Vorkommen dieser Proteine, aber es ist offensichtlich, dass in bestimmten Zellkompartimenten eine Kombination verschiedener AJ und TJ für die Vermittlung von Zell-Zell-Kommunikation und -Adhäsion verantwortlich ist [25].

## Funktionelle Bedeutung von hCG in Bezug auf Zell-Adhäsionsproteine im humanen Corpus luteum

Das zyklische Wachstum und die Entwicklung des Corpus luteum wird durch Gonadotropine reguliert. Während des normalen Zyklus ist die Lebensspanne, beeinflusst durch LH, auf 14 Tage limitiert. Kommt es jedoch zu einer Schwangerschaft, überlebt das Corpus luteum durch den Effekt von hCG für mehrere Monate, was als „luteal rescue“ bezeichnet wird. Für das humane Corpus luteum konnte gezeigt werden, dass das „luteal rescue“ mit der Expansion von Lutealgefäßen einhergeht [34], was vermutlich ein Re-Arrangement von Zelladhäsionsproteinen beinhaltet. Daher ist es von besonderem Interesse, sich mit dem Effekt von hCG auf AJ und TJ im humanen Corpus luteum zu beschäftigen:

Im „geretteten“ humanen Corpus luteum einer durch hCG in vivo simulierten Schwangerschaft wird Claudin 1 und Occludin im Granulosaluteinzell-Kompartiment signifikant herunterreguliert [25]. Darüber hinaus kommt es im Endothelzell-Kompartiment zu einer Abnahme von Occludin, Claudin 5 und VE-Cadherin. Es ist zu vermuten, dass diese hCG-abhängige Regulation der AJ- und TJ-Proteine durch die Unterstützung der Funktion des Corpus luteum von außerordentlicher Bedeutung für den Erhalt der Frühschwangerschaft ist. Die Abnahme der Expression von Zelladhäsionsmolekülen im Granulosaluteinzell-Kompartiment scheint dabei die strukturelle Voraussetzung für die Freisetzung steroidogener Moleküle wie Progesteron oder Vascular Endothelial Growth Factor (VEGF) zu sein [35]. Die Entwicklung des Corpus luteum nach dem „luteal rescue“ ist gekennzeichnet durch eine strukturelle Neuorientierung. Die Herunterregulation von Zelladhäsionsmolekülen führt dabei zu einer Zunahme des interzellularen Spaltes, was zum einen die Invasion und Expansion neuer Gefäße begünstigt und zum anderen die Permeabilität des Endothels steigert. Beides erleichtert die Verteilung bzw. Abgabe von Hormonen an den Blutkreislauf, die für den Erhalt der Frühschwangerschaft notwendig sind. Dies wird zusätzlich durch die Tatsache begünstigt, dass hCG die Gefäßpermeabilität erhöht [36, 37]. In der Ratte ist dieser Anstieg mit erniedrigtem Claudin 5 assoziiert [37].

## Einfluss von VEGF auf Zelladhäsionsmoleküle im Corpus luteum von Primaten

Wie oben ausführlich dargestellt wurde, konnte gezeigt werden, dass hCG die Expression von Zelladhäsionsmolekülen reduziert, und so luteale Angiogenese und Gefäßpermeabilität beeinflusst. Zusätzlich wurde nachgewiesen, dass Inhibition von VEGF hemmend auf die ovarielle Angiogenese, Entwicklung und Funktion wirkt [38–40]. Darüber hinaus konnte gezeigt werden, dass VEGF Zelladhäsionsmoleküle im Marmoset kontrolliert:

Die Menge des im Bereich der Zellmembran von Granulosaluteinzellen lokalisierten Occludins reduziert sich im Verlauf der Ovulationsphase kontinuierlich, um schließlich gar nicht mehr nachweisbar zu sein [41]. Dieser Verlust von Occludin scheint in die Bildung des Antrums involviert zu sein [42, 43]. Im Gegensatz dazu führt die Hemmung von VEGF in Marmosets in vivo durch einen VEGF-Antagonisten (VEGF-Trap) zu einem signifikanten Anstieg der Menge an Occludin [41], vor allem im zytoplasmatischen Bereich, wo das Occludin keine Funktion hat [44].

Das TJ-Protein Claudin 5 ist im Marmoset ausschließlich in den Thekagefäßen nachweisbar, und seine Menge nimmt im Verlauf der Follikelreifung zu. Im Corpus luteum wird Claudin 5 ebenfalls

im Bereich der Gefäße exprimiert. Hier führt die Hemmung von VEGF zu einem Anstieg von Claudin 5. Offensichtlich spielt Claudin 5 eine wichtige Rolle bei der Kontaktinhibition von Endothelzellen. Dadurch wird die Proliferationsrate der Zellen reduziert, und die Gefäße stabilisieren sich [41]. Sobald einzelne Endothelzellen in Kontakt mit benachbarten Zellen kommen, verbinden sich die Adhäsionsmoleküle zu Komplexen und das Endothel wird durch den proangiogenetischen Effekt von VEGF weniger beeinträchtigt. Diese Zelladhäsion ist in Bezug auf die Regulation von Angiogenese essenziell [45].

Für VE-Cadherin konnte nachgewiesen werden, dass dessen Hemmung eine Abnahme der Angiogenese-Rate und damit der Gefäßentwicklung auslöst [45]. VEGF agiert hier als Schlüssel-molekül für die Regulation von Angiogenese im Ovar [34, 35, 38, 39, 46]. Darüber hinaus konnte, funktionell betrachtet, ein enger Zusammenhang zwischen VEGF und der Signaltransduktion von Zelladhäsionsmolekülen gezeigt werden.

## Zelladhäsionsproteine und Permeabilität

Vor einiger Zeit wurde in einem In-vitro-Endothelzell-Modell gezeigt, dass hCG offensichtlich einen direkten Effekt auf die Expression von VE-Cadherin und auf die endotheliale Permeabilität hat [47]. Allerdings ist die Bedeutung und die Signaltransduktion eines mutmaßlichen LH/hCG-Rezeptors unklar. Man geht davon aus, dass der Rezeptor eine hormonelle Transzytosefunktion ausübt und auf diese Weise Gonadotropine direkt zur Zielzelle befördert [48]. Um die molekulare Regulation der Endothelzellen im Corpus luteum zu untersuchen, wurde dann ein In-vitro-Co-Kulturmodell entwickelt. Dabei handelt es sich um ein 2-Kammer-Modell aus Endothel- und Granulosaluteinzellen, deren Interaktion als Reaktion auf stimulierende Substanzen untersucht werden kann [49]. Im Corpus luteum wurde in vivo gezeigt, dass das endotheliale Zelladhäsionsprotein Claudin 5 nach hCG-Behandlung im Sinne einer simulierten Schwangerschaft abfällt [25]; dies konnte in oben beschriebenem Zellkulturmodell bestätigt werden. Außerdem konnte durch hCG-Behandlung in co-kultivierten Granulosaluteinzellen erstmals auch eine Auswirkung auf die endotheliale Permeabilität nachgewiesen werden [49]. Obwohl ein möglicher direkter Einfluss von hCG auf Endothelzellen nicht auszuschließen ist [47], ist es offensichtlich, dass der hCG-Effekt auf Claudin 5 und auf die Permeabilität indirekter Natur ist, da er nur in Anwesenheit von Granulosaluteinzellen beobachtet wird. Aus diesem Grund ist ein hCG-abhängiger Faktor, der von den Granulosaluteinzellen synthetisiert wird, vermutet worden, und dieser Faktor ist VEGF. In der Tat ist es so, dass hCG-Behandlung von Granulosaluteinzellen zu einem Anstieg von VEGF führt [49–51], und die Wirkung von VEGF auf die endotheliale Permeabilität wurde in vitro mehrfach nachgewiesen [36, 47]. Daher gilt VEGF als wichtiger parakriner Faktor, der über Beeinflussung von Adhäsionsproteinen die Regulation von Endothelzell-Permeabilität kontrolliert [52, 53]. Dies wird auch durch die Beobachtung gestützt, dass die Hemmung von VEGF in vivo neben Angiogenese auch Permeabilität supprimiert [45]. Umgekehrt betrachtet löst VEGF in Endothelzellen eine Freisetzung von VE-Cadherin aus, und dies wiederum resultiert in gesteigerter endothelialer Permeabilität [49]. Diese Tatsache weist tatsächlich auf einen direkten Zusammenhang zwischen hCG, VEGF, Zelladhäsionsproteinen und gesteigerter Permeabilität hin.

## Interaktion von Zelladhäsionsproteinen in Endothelzellen

Funktionelle Interaktionen von Zelladhäsionsproteinen, die als Regulator von vaskulärer Permeabilität wirken, wurden für verschiedenste Systeme gezeigt. Trotz der Tatsache, dass das Corpus zu den mit Abstand am stärksten vaskularisierten Gewebetypen gehört, und dass die Kontrolle von Permeabilität für dessen Funktion von großer Bedeutung ist, sind diese Zusammenhänge für das Corpus luteum noch recht unbekannt geblieben.

Zelladhäsionsproteine als dynamische Komplexe verändern ihre Konformation nicht nur während der Embryonalentwicklung, sondern auch in ruhenden Zellen des adulten Gefäßsystems [54]. Sie interagieren dabei auch untereinander im Sinne einer Antwort auf extrazelluläre Signale [55, 56]. Dementsprechend wurde die Koexistenz verschiedenster Zelladhäsionsproteine für ganz unterschiedliche Gewebetypen in unterschiedlichen Spezies nachgewiesen. Für das Gefäßsystem des humanen Corpus luteum wurde gezeigt, dass das AJ-Protein VE-Cadherin sowie die TJ-Proteine Nectin 2 und Claudin 5 in der mittleren Lutealphase co-lokalisiert sind [57]. Die Behandlung von Granulosaluteinzellen mit hCG in vitro führt dabei VEGF-vermittelt zu einer verminderten Expression dieser Proteine. Darüber hinausgehend besteht ein funktioneller Zusammenhang, da VE-Cadherin, Nectin 2 und Claudin 5 sich gegenseitig regulieren: Ausschalten von VE-Cadherin oder Claudin 5 löst eine Herunterregulation der jeweils anderen Proteine aus, wohingegen Nectin 2 nicht regulierend auf VE-Cadherin und Claudin 5 wirkt. Diese Wechselwirkungen sind nicht nur struktureller Art, sondern haben auch einen funktionellen Einfluss auf die Permeabilität des Endothels. hCG-induzierte Herunterregulation der oben genannten Proteine führt zu gesteigerter Permeabilität. Dazu kommt, dass das separate Ausschalten von VE-Cadherin, Claudin 5 und Nectin 2 in vitro ebenfalls jeweils zu einem Anstieg der Permeabilität führt. Zusammen genommen deutet dies darauf hin, dass VE-Cadherin und Claudin 5 offensichtlich eine bedeutende Rolle bez. der Regulation von Permeabilität über Nectin 2 spielen. Außerdem beeinflusst auch Nectin 2 selbst die Permeabilität direkt.

Da diese 3 diskutierten Proteine im Gefäßsystem des Corpus luteum co-lokalisiert und durch hCG über VEGF herunterreguliert werden, nimmt man an, dass hCG eine Kettenreaktion über VE-Cadherin und/oder Claudin 5 auslöst, um so Nectin 2 und konsekutiv die luteale Permeabilität zu kontrollieren (● Abb. 1) [57]. Diese Erkenntnis könnte in Situationen mit pathologisch gesteigerter Permeabilität des Endothels, wie z. B. dem OHSS, therapie-relevant werden.

### Fazit für die Praxis

Die Entstehung einer hCG-induzierten Steigerung der endothelialen Permeabilität ist offensichtlich durch VEGF vermittelt. Im Falle eines OHSS könnte dieser Mechanismus für die Entwicklung von Aszites verantwortlich sein und einen möglichen therapeutischen Angriffspunkt im Sinne einer VEGF-Antagonisierung darstellen.

### Interessenkonflikt

Nein.

## Literatur

- 1 Stocco C, Telleria C, Gibori G. The molecular control of corpus luteum formation, function, and regression. *Endocr Rev* 2007; 28: 117–149
- 2 Matsubara H, Ikuta K, Ozaki Y et al. Gonadotropins and cytokines affect luteal function through control of apoptosis in human luteinized granulosa cells. *J Clin Endocrinol Metab* 2000; 85: 1620–1626
- 3 Dickinson RE, Stewart AJ, Myers M et al. Differential expression and functional characterization of luteinizing hormone receptor splice variants in human luteal cells: implications for luteolysis. *Endocrinology* 2009; 150: 2873–2881
- 4 Del Canto F, Sierralta W, Kohen P et al. Features of natural and gonadotropin-releasing hormone antagonist-induced corpus luteum regression and effects of in vivo human chorionic gonadotropin. *J Clin Endocrinol Metab* 2007; 92: 4436–4443
- 5 Duncan WC, Gay E, Maybin JA. The effect of human chorionic gonadotropin on the expression of progesterone receptors in human luteal cells in vivo and in vitro. *Reproduction* 2005; 130: 83–93
- 6 Dickinson RE, Myers M, Duncan WC. Novel regulated expression of the SLIT/ROBO pathway in the ovary: possible role during luteolysis in women. *Endocrinology* 2008; 149: 5024–5034
- 7 Baird DD, Weinberg CR, McConaughy DR et al. Rescue of the corpus luteum in human pregnancy. *Biol Reprod* 2003; 68: 448–456
- 8 Illingworth DV, Heap RB. A decrease in the metabolic clearance rate of progesterone in the coypu during pregnancy. *J Reprod Fertil* 1971; 27: 492–494
- 9 Dejana E. Endothelial cell-cell junctions: happy together. *Nat Rev Mol Cell Biol* 2004; 5: 261–270
- 10 Bazzoni G, Dejana E. Endothelial cell-to-cell junctions: molecular organization and role in vascular homeostasis. *Physiol Rev* 2004; 84: 869–901
- 11 Walz A, Keck C, Weber H et al. Effects of luteinizing hormone and human chorionic gonadotropin on corpus luteum cells in a spheroid cell culture system. *Mol Reprod Dev* 2005; 72: 98–104
- 12 Delvigne A, Rozenberg S. Review of clinical course and treatment of ovarian hyperstimulation syndrome (OHSS). *Hum Reprod Update* 2003; 9: 77–96
- 13 Heger A, Sator M, Pietrowski D. Endometrial receptivity and its predictive value for IVF/ICSI-outcome. *Geburtsh Frauenheilk* 2012; 72: 710–715
- 14 Isachenko V, Nawroth F, Rahimi G et al. Vascularised chorioallantoic membrane (CAM) culture system for cryopreserved human ovarian tissue as an alternative to xenotransplantation. *Geburtsh Frauenheilk* 2011; 71: 862–868
- 15 Fatemi HM, Popovic-Todorovic B, Papanikolaou E et al. An update of luteal phase support in stimulated IVF cycles. *Hum Reprod Update* 2007; 13: 581–590
- 16 Delvigne A, Rozenberg S. Systematic review of data concerning etiology of ovarian hyperstimulation syndrome. *Int J Fertil Womens Med* 2002; 47: 211–226
- 17 Dejana E, Orsenigo F, Molendini C et al. Organization and signaling of endothelial cell-to-cell junctions in various regions of the blood and lymphatic vascular trees. *Cell Tissue Res* 2009; 335: 17–25
- 18 Dejana E, Tournier-Lasserre E, Weinstein BM. The control of vascular integrity by endothelial cell junctions: molecular basis and pathological implications. *Dev Cell* 2009; 16: 209–221
- 19 Cavey M, Rauzi M, Lenne PF et al. A two-tiered mechanism for stabilization and immobilization of E-cadherin. *Nature* 2008; 453: 751–756
- 20 Chitaev NA, Troyanovsky SM. Adhesive but not lateral E-cadherin complexes require calcium and catenins for their formation. *J Cell Biol* 1998; 142: 837–846
- 21 Nelson WJ, Veshnock PJ. Ankyrin binding to (Na<sup>+</sup> + K<sup>+</sup>)ATPase and implications for the organization of membrane domains in polarized cells. *Nature* 1987; 328: 533–536
- 22 Yap AS, Brieher WM, Gumbiner BM. Molecular and functional analysis of cadherin-based adherens junctions. *Annu Rev Cell Dev Biol* 1997; 13: 119–146
- 23 Nitta T, Hata M, Gotoh S et al. Size-selective loosening of the blood-brain barrier in claudin-5-deficient mice. *J Cell Biol* 2003; 161: 653–660
- 24 Carmeliet P, Lampugnani MG, Moons L et al. Targeted deficiency or cytosolic truncation of the VE-cadherin gene in mice impairs VEGF-mediated endothelial survival and angiogenesis. *Cell* 1999; 98: 147–157
- 25 Groten T, Fraser HM, Duncan WC et al. Cell junctional proteins in the human corpus luteum: changes during the normal cycle and after HCG treatment. *Hum Reprod* 2006; 21: 3096–3102



- 26 Langbein L, Grund C, Kuhn C et al. Tight junctions and compositionally related junctional structures in mammalian stratified epithelia and cell cultures derived therefrom. *Eur J Cell Biol* 2002; 81: 419–435
- 27 Leach L, Babawale MO, Anderson M et al. Vasculogenesis, angiogenesis and the molecular organisation of endothelial junctions in the early human placenta. *J Vasc Res* 2002; 39: 246–259
- 28 You K, Xu X, Fu J et al. Hyperoxia disrupts pulmonary epithelial barrier in newborn rats via the deterioration of occludin and ZO-1. *Respir Res* 2012; 13: 36
- 29 Butt AM, Feng D, Nasrullah I et al. Computational identification of interplay between phosphorylation and O-beta-glycosylation of human occludin as potential mechanism to impair hepatitis C virus entry. *Infect Genet Evol* 2012; 12: 1235–1245
- 30 Errede M, Girolamo F, Ferrara G et al. Blood-brain barrier alterations in the cerebral cortex in experimental autoimmune encephalomyelitis. *J Neuropathol Exp Neurol* 2012; 71: 840–854
- 31 Zhu Y, Maric J, Nilsson M et al. Formation and barrier function of tight junctions in human ovarian surface epithelium. *Biol Reprod* 2004; 71: 53–59
- 32 Fujibe M, Chiba H, Kojima T et al. Thr203 of claudin-1, a putative phosphorylation site for MAP kinase, is required to promote the barrier function of tight junctions. *Exp Cell Res* 2004; 295: 36–47
- 33 Peppi M, Ghabriel MN. Tissue-specific expression of the tight junction proteins claudins and occludin in the rat salivary glands. *J Anat* 2004; 205: 257–266
- 34 Wulff C, Dickson SE, Duncan WC et al. Angiogenesis in the human corpus luteum: simulated early pregnancy by HCG treatment is associated with both angiogenesis and vessel stabilization. *Hum Reprod* 2001; 16: 2515–2524
- 35 Wulff C, Wilson H, Lague P et al. Angiogenesis in the human corpus luteum: localization and changes in angiopoietins, tie-2, and vascular endothelial growth factor messenger ribonucleic acid. *J Clin Endocrinol Metab* 2000; 85: 4302–4309
- 36 Albert C, Garrido N, Mercader A et al. The role of endothelial cells in the pathogenesis of ovarian hyperstimulation syndrome. *Mol Hum Reprod* 2002; 8: 409–418
- 37 Kitajima Y, Endo T, Nagasawa K et al. Hyperstimulation and a gonadotropin-releasing hormone agonist modulate ovarian vascular permeability by altering expression of the tight junction protein claudin-5. *Endocrinology* 2006; 147: 694–699
- 38 Wulff C, Wiegand SJ, Saunders PT et al. Angiogenesis during follicular development in the primate and its inhibition by treatment with truncated Flt-1-Fc (vascular endothelial growth factor Trap(A40)). *Endocrinology* 2001; 142: 3244–3254
- 39 Wulff C, Wilson H, Wiegand SJ et al. Prevention of thecal angiogenesis, antral follicular growth, and ovulation in the primate by treatment with vascular endothelial growth factor Trap R1R2. *Endocrinology* 2002; 143: 2797–2807
- 40 Taylor PD, Wilson H, Hillier SG et al. Effects of inhibition of vascular endothelial growth factor at time of selection on follicular angiogenesis, expansion, development and atresia in the marmoset. *Mol Hum Reprod* 2007; 13: 729–736
- 41 Rodewald M, Herr D, Fraser HM et al. Regulation of tight junction proteins occludin and claudin 5 in the primate ovary during the ovulatory cycle and after inhibition of vascular endothelial growth factor. *Mol Hum Reprod* 2007; 13: 781–789
- 42 Sundfeldt K, Piontkewitz Y, Billig H et al. E-cadherin-catenin complex in the rat ovary: cell-specific expression during folliculogenesis and luteal formation. *J Reprod Fertil* 2000; 118: 375–385
- 43 Kawagishi R, Tahara M, Morishige K et al. Expression of nectin-2 in mouse granulosa cells. *Eur J Obstet Gynecol Reprod Biol* 2005; 121: 71–76
- 44 Alexander JS, Elrod JW. Extracellular matrix, junctional integrity and matrix metalloproteinase interactions in endothelial permeability regulation. *J Anat* 2002; 200: 561–574
- 45 Nakhuda GS, Zimmermann RC, Bohlen P et al. Inhibition of the vascular endothelial cell (VE)-specific adhesion molecule VE-cadherin blocks gonadotropin-dependent folliculogenesis and corpus luteum formation and angiogenesis. *Endocrinology* 2005; 146: 1053–1059
- 46 Wulff C, Wilson H, Rudge JS et al. Luteal angiogenesis: prevention and intervention by treatment with vascular endothelial growth factor trap(A40). *J Clin Endocrinol Metab* 2001; 86: 3377–3386
- 47 Villasante A, Pacheco A, Ruiz A et al. Vascular endothelial cadherin regulates vascular permeability: Implications for ovarian hyperstimulation syndrome. *J Clin Endocrinol Metab* 2007; 92: 314–321
- 48 Misrahi M, Beau I, Ghinea N et al. The LH/CG and FSH receptors: different molecular forms and intracellular traffic. *Mol Cell Endocrinol* 1996; 125: 161–167
- 49 Rodewald M, Herr D, Duncan WC et al. Molecular mechanisms of ovarian hyperstimulation syndrome: paracrine reduction of endothelial claudin 5 by hCG in vitro is associated with increased endothelial permeability. *Hum Reprod* 2009; 24: 1191–1199
- 50 Neulen J, Raczek S, Pogorzelski M et al. Secretion of vascular endothelial growth factor/vascular permeability factor from human luteinized granulosa cells is human chorionic gonadotrophin dependent. *Mol Hum Reprod* 1998; 4: 203–206
- 51 Fraser HM, Bell J, Wilson H et al. Localization and quantification of cyclic changes in the expression of endocrine gland vascular endothelial growth factor in the human corpus luteum. *J Clin Endocrinol Metab* 2005; 90: 427–434
- 52 Wright TJ, Leach L, Shaw PE et al. Dynamics of vascular endothelial-cadherin and beta-catenin localization by vascular endothelial growth factor-induced angiogenesis in human umbilical vein cells. *Exp Cell Res* 2002; 280: 159–168
- 53 Lampugnani MG, Orsenigo F, Gagliani MC et al. Vascular endothelial cadherin controls VEGFR-2 internalization and signaling from intracellular compartments. *J Cell Biol* 2006; 174: 593–604
- 54 Kametani Y, Takeichi M. Basal-to-apical cadherin flow at cell junctions. *Nat Cell Biol* 2007; 9: 92–98
- 55 Furuse M, Tsukita S. Claudins in occluding junctions of humans and flies. *Trends Cell Biol* 2006; 16: 181–188
- 56 Van Itallie CM, Anderson JM. Claudins and epithelial paracellular transport. *Annu Rev Physiol* 2006; 68: 403–429
- 57 Herr D, Fraser HM, Konrad R et al. Human chorionic gonadotropin controls luteal vascular permeability via vascular endothelial growth factor by down-regulation of a cascade of adhesion proteins. *Fertil Steril* 2013; 99: 1749–1758
